# Supplementary material
Source: MDPI journal article supplement (https://www.mdpi.com/2504-3110/8/3/175)
Supplement: s1 [file s1]

**Figures S1-S10** represent positive PCR results from peripheral blood (**1-8 for BGD1, 9-10 for BGD26 strain**)

Every reaction contains positive control (RH *T. gondii* strain) tested in one well. Samples were tested in duplicate.

**S1** – 1 sample, positive in both wells (Ct 39.93; 37.97)

**S2** – 1 sample, positive in both wells (Ct 35.93; 38.98)

**S3** – 2 samples (1. positive in one well (Ct 40.98), 2. positive in both wells (Ct 38.72; 37.41))

**S4** – 1 sample, positive in one well (Ct 39.63)

**S5** – 3 samples, positive in one well (1. Ct 39.92 2. 38.99 3. 39.94)

**S6** – 2 samples, positive in one well (1. Ct 39.51, 2. Ct 36.62)

**S7** – 1 sample, positive in one well (Ct 39.49)

**S8** – 1 sample, positive in one well (Ct 36.33)

**S9** – 1 sample, positive in both wells (Ct 38.5; 37.43)

**S10** – 2 samples, positive in both wells (1. Ct 37.67; 36.95 2. Ct 40.56; 39.03)
